# Supplementary material
Source: Springer Nature journal article supplement (https://www.springermedizin.de/resource/supplementary/12913_2014_3473_MOESM1_ESM.pdf/9532906)

**A: Number of Individuals**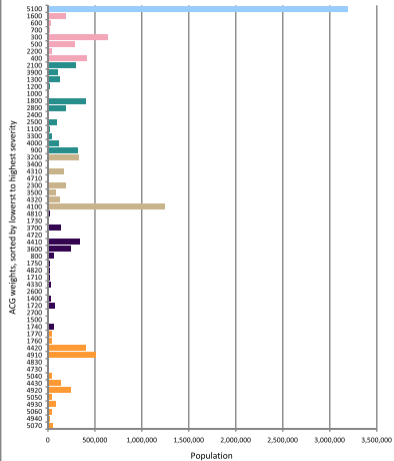**B: Total System Cost**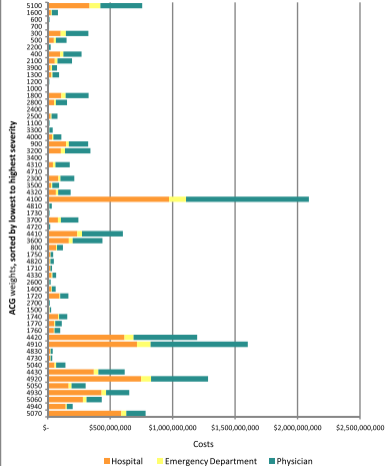**C: Mean Cost per Individual**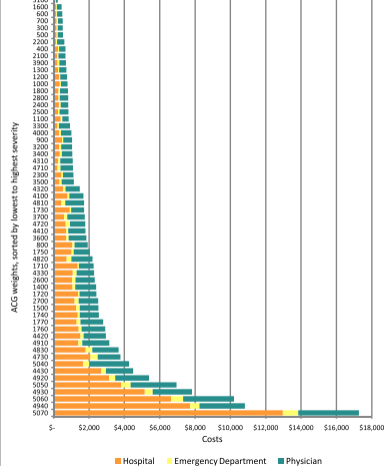

Supplement: MOESM1 [file 9532906]
